# Supplementary material for: Gellan gum-coated gold nanorods: an intracellular nanosystem for bone tissue engineering
Source: Royal Society of Chemistry journal article supplement (doi:10.1039/c5ra13556g), 2015-01-01

## Supporting Information

### **Gellan Gum-coated Gold Nanorods: an Intracellular Nanosystem for Bone Tissue Engineering**

Sílvia Vieira<sup>a,b,c</sup>, Stephanie Vial<sup>a,b\*</sup>, F. Raquel Maia<sup>a,b</sup>, Mariana Carvalho<sup>a,b</sup>, Rui L. Reis<sup>a,b</sup>, Pedro L. Granja<sup>c,d,e,f</sup>, J. Miguel Oliveira<sup>a,b\*</sup>

a - 3B's Research Group, AvePark – Parque de Ciência e Tecnologia, Zona Industrial da Gandra, 4805-017 Barco – Guimarães, Portugal

b - ICVS/3B's - PT Government Associate Laboratory, Braga/Guimarães, Portugal

c - INEB - Instituto de Engenharia Biomédica, Universidade do Porto, Rua do Campo Alegre, 823, 4150-180 Porto, Portugal

d - i3S - Instituto de Investigação e Inovação em Saúde, Universidade do Porto, Rua Dr. Manuel Pereira da Silva, 4200-393 Porto, Portugal.

e - FEUP - Faculdade de Engenharia da Universidade do Porto, Rua Dr. Roberto Frias, 4200-465 Porto, Portugal.

f - ICBAS – Instituto de Ciências Biomédicas Abel Salazar, Universidade do Porto, Rua de Jorge Viterbo Ferreira 228, 4050-313 Porto, Portugal.

\*Corresponding Authors:

Dr. Stephanie Vial, Dr. J. Miguel Oliveira

E-mails: [stephanie.vial@dep.uminho.pt](mailto:stephanie.vial@dep.uminho.pt) ; [miguel.oliveira@dep.uminho.pt](mailto:miguel.oliveira@dep.uminho.pt)

Figure S1

A) UV-vis spectrum and B) TEM image of as-prepared AuNRs.

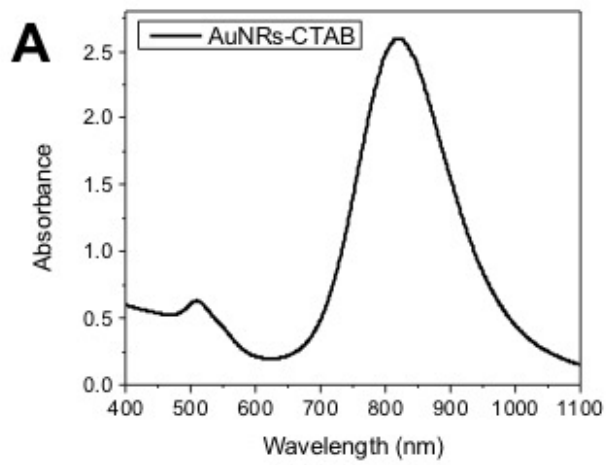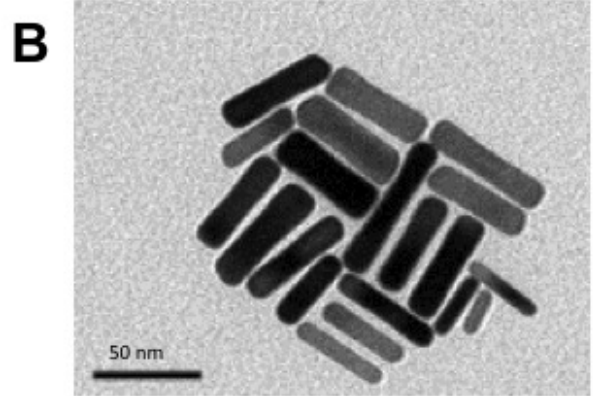

Figure S2

UV-Vis spectrometry analysis of gold nanorods stability against ionic strength and pH. A) UV-Vis spectra of AuNRs-PAH solutions at 0, 0.001, 0.005, 0.01, 0.02, 0.05, 0.1 and 0.5 M of NaCl; B) UV-Vis spectra of AuNRs-PAH solutions at pH varying from 2 to 10.

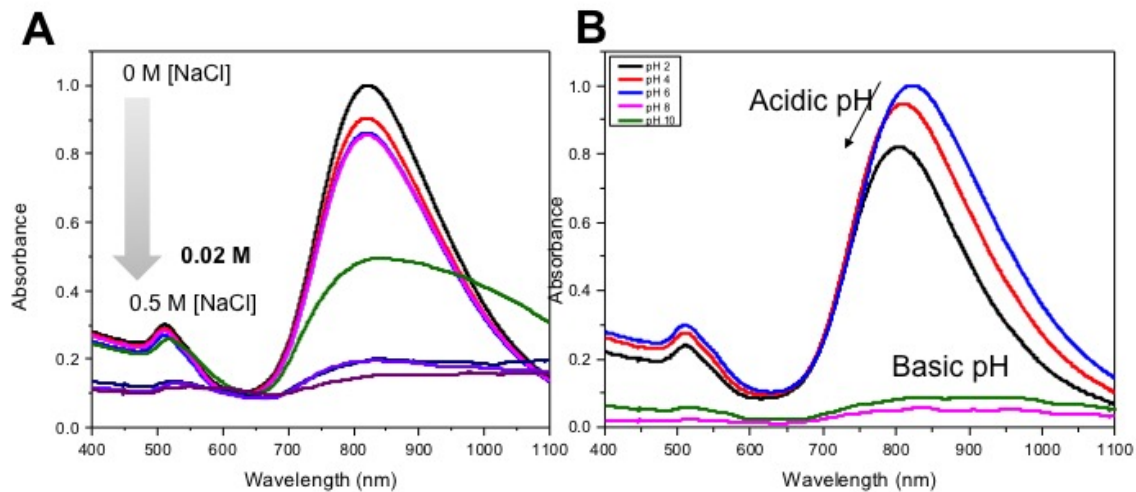

Figure S3

A) Photographic images of the solutions of AuNRs-GG at pH 2, 4, 6, 8, 10 and B) UV-vis spectra of AuNRs-GG at pH 2 and upon increase at pH 6.

**A**

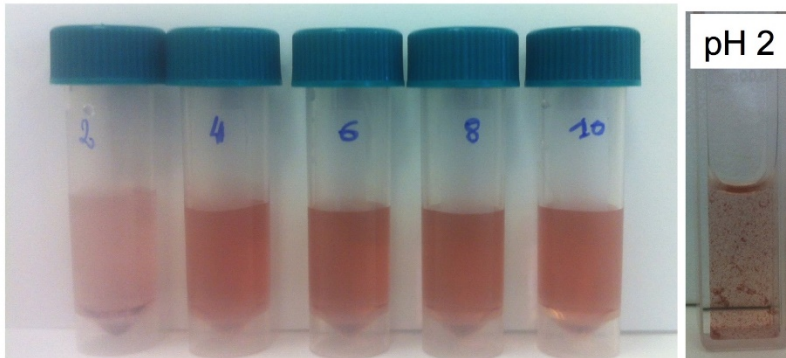

**B**

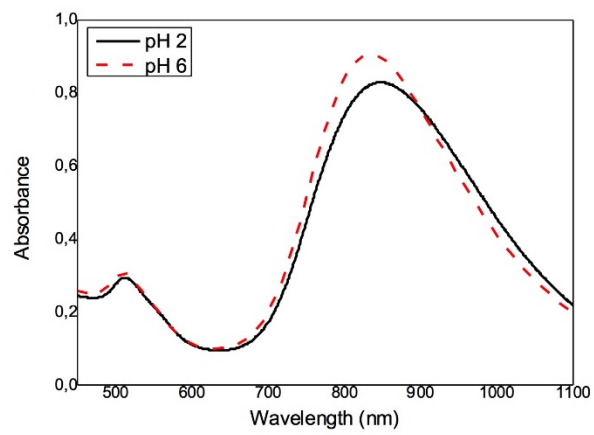

Supplement: c5ra13556g1.pdf [file c5ra13556g1.pdf]
